# Supplementary material for: Breast Cancer Promotes Cardiac Dysfunction Through Deregulation of Cardiomyocyte Ca2+‐Handling Protein Expression That is Not Reversed by Exercise Training
Source: PubMed Central journal article supplement — J Am Heart Assoc. 2021 Feb 23;10(5):e018076. doi: 10.1161/JAHA.120.018076 (PMC8174298; doi:10.1161/jaha.120.018076), 2021-02-23
Supplement: JAH3-10-e018076-s001.pdf [file JAH3-10-e018076-s001.pdf]

# **SUPPLEMENTAL MATERIAL**

## **Data S1.**

### **SUPPLEMENTAL RESULTS**

#### *Impact of Breast Cancer*

##### *Breast cancer provokes physical characteristic changes*

Body weight in MMTV-PyMT<sup>+</sup> and MMTV-PyMT<sup>-</sup> mice is shown in **Figure S1**. Body weight increased in both MMTV-PyMT<sup>-</sup> and MMTV-PyMT<sup>+</sup> mice (p-time<0.001). Despite of significant interaction (p=0.013), it was not possible to identify the difference between groups throughout the study. Body weight after euthanasia was higher in MMTV-PyMT<sup>+</sup> mice (p<0.001). This difference was due to tumor burden, since body weight without tumor was similar between groups.

Values of organs and tissues are shown in **Table S1**. Observe that anterior tibial muscle, lung and brown and white fat weight were not different between MMTV-PyMT<sup>-</sup> and MMTV-PyMT<sup>+</sup> mice, liver and spleen were greater in MMTV-PyMT<sup>+</sup> mice, while kidney and soleus muscle were lower in MMTV-PyMT<sup>+</sup> mice.

##### *Breast cancer alters cardiac morphology and function*

All cardiac function and morphology parameters analyzed are shown in **Table S2**. The pooled data (beginning and end of the study) of the LVEDD (PyMT<sup>-</sup> pre and post vs. PyMT<sup>+</sup> pre and post; p-group<0.001, p-interaction=0.417) and LVEDV (PyMT<sup>-</sup> pre and post vs. PyMT<sup>+</sup> pre and post; p-group=0.003, p-interaction=0.437) were lower in the MMTV-PyMT<sup>+</sup> mice when compared to MMTV-PyMT<sup>-</sup>. LVESD and LVESV were similar between MMTV-PyMT<sup>-</sup> and MMTV-PyMT<sup>+</sup> mice. The left atrium responses were statistically different between groups throughout the experimental protocol (p-interaction=0.004). At the beginning of the study, the left atrium was not different between MMTV-PyMT<sup>+</sup> and MMTV-PyMT<sup>-</sup>;

however, at the end of the study, the left atrium was lower in MMTV- PyMT+ mice ( $0.079\pm 0.001$  vs.  $0.091\pm 0.008$  mm/g,  $p=0.030$ ) (**Table S2**). The pooled data (beginning and end of the study) of the left ventricular mass was lower in MMTV-PyMT+ mice than in MMTV-PyMT- mice (PyMT- pre:  $4.297\pm 0.798$  and post:  $3.396\pm 0.496$  vs. PyMT+ pre:  $3.454\pm 0.649$  and post:  $2.968 \pm 0.601$  mg/g,  $p\text{-group}<0.001$ ,  $p\text{-interaction}=0.365$ ). E/E' wave, E-wave deceleration time and IVRT values were not different between groups. Similarly, heart rate, fractional shortening, ejection fraction and myocardium performance index were not different in MMTV-PyMT- and MMTV-PyMT+ mice.

Longitudinal strain and strain rate at the beginning and at the end of the study are shown in **Table S2**. The pooled data (beginning and end of the study) of the longitudinal strain (PyMT- pre and post vs. PyMT+ pre and post,  $p\text{-group}<0.001$ ,  $p\text{-interaction}=0.126$ ) and strain rate (PyMT- pre and post vs. PyMT+ pre and post,  $p\text{-group}=0.030$ ,  $p\text{-interaction}=0.168$ ) were impaired in the MMTV-PyMT+ mice when compared to MMTV-PyMT- mice. Both longitudinal strain and strain rate were statistically lower in absolute value in animals with cancer than in control animals. Radial strain and strain rate as well as radial and circumferential short systolic axis were similar between groups.

***Exercise training does not reverse morphologic and physiologic changes in MMTV-PyMT+ mice, and does not delay time to tumor growth***

Exercise training did not change body weight (**Figure S2**,  $p\text{-interaction}=0.930$ ) and organs and tissues weight (**Table S3**,  $p>0.05$ ). Also, ET did not influence tumor growth.

Exercise training did not prevent the decline in exercise tolerance (**Figure S3**,  $p=0.069$ ), despite the increase in citrate synthase activity in the anterior tibial and soleus muscles (**Figure S4**,  $p<0.001$ ).

Individual data of cardiac morphology and function in sedentary and exercise-trained MMTV-PyMT+ mice are shown in **Figure S5**. Exercise training decreased LVESD ( $p$ -

group=0.038, p-interaction=0.226) and LVEDV (p-group=0.026, p-interaction=0.431), but did not change the other parameters associated with cardiac morphology (**Table S4**). Despite the average difference in longitudinal strain rate responses throughout the experimental protocol (p-interaction=0.032, **Table S4**), it was not possible to identify differences between sedentary and exercise-trained MMTV-PyMT+ mice.

Exercise training did not improve phospholamban (p=0.006) and did not change SERCA2a (p=0.345), p-phospholamban (p=0.554), NCX (p=0.247) and SERCA2a/phospholamban (p=0.111) (**Figure S6**).

**Table S1. Organ, tissue and tumor weight in MMTV-PyMT- and MMTV-PyMT+.**

| Variable        | MMTV-PyMT-           |    | MMTV-PyMT+           |    | P                |
|-----------------|----------------------|----|----------------------|----|------------------|
|                 | median (IQR)         | N  | median (IQR)         | N  |                  |
| Anterior tibial | 0.039 (0.036; 0.041) | 12 | 0.036 (0.033; 0.039) | 14 | 0.060            |
| Soleus          | 0.007 (0.007; 0.007) | 14 | 0.006 (0.006; 0.007) | 15 | <b>0.029</b>     |
| Lung            | 0.15 (0.14; 0.17)    | 14 | 0.15 (0.14; 0.16)    | 15 | 0.983            |
| Liver           | 0.98 (0.94; 1.04)    | 14 | 1.24 (1.16; 1.37)    | 15 | <b>&lt;0.001</b> |
| Spleen          | 0.069 (0.06; 0.081)  | 14 | 0.121 (0.094; 0.147) | 15 | <b>&lt;0.001</b> |
| Kidney          | 0.26 (0.25; 0.28)    | 14 | 0.23 (0.22; 0.25)    | 15 | <b>0.001</b>     |
| Brown fat       | 0.063 (0.046; 0.082) | 13 | 0.057 (0.042; 0.08)  | 14 | 0.583            |
| White fat       | 0.15 (0.13; 0.2)     | 13 | 0.12 (0.09; 0.16)    | 14 | 0.068            |
| Breast tumor    |                      |    | 1.41 (1.22; 1.56)    | 15 |                  |
| All tumors      |                      |    | 2.95 (2.55; 4.64)    | 15 |                  |

Mann-Whitney's test. Values are expressed as medians and interquartile ranges (IQR). Anterior tibial was not collected in two mice in the MMTV-PyMT- group and brown and white fats were not collected in one mouse in the MMTV-PyMT- group and one mouse in the MMTV-PyMT+ group.

**Table S2. Morphological and functional cardiac parameters in MMTV-PyMT- and MMTV-PyMT+ mice in the pre and post experimental protocol.**

| Variable              | MMTV-PyMT-  |             | MMTV-PyMT+  |             | P Group          | P Time           | P Interaction |
|-----------------------|-------------|-------------|-------------|-------------|------------------|------------------|---------------|
|                       | pre         | post        | pre         | post        |                  |                  |               |
| <b>Morphology</b>     |             |             |             |             |                  |                  |               |
| LVEDD/weight (mm/g)   | 0.185±0.019 | 0.168±0.01  | 0.177±0.014 | 0.151±0.014 | <b>&lt;0.001</b> | <b>&lt;0.001</b> | 0.417         |
| LVESD/weight (mm/g)   | 0.125±0.022 | 0.112±0.019 | 0.12±0.018  | 0.096±0.014 | 0.060            | <b>0.001</b>     | 0.309         |
| LV Mass/weight (mg/g) | 4.297±0.798 | 3.396±0.496 | 3.454±0.649 | 2.968±0.601 | <b>&lt;0.001</b> | <b>0.002</b>     | 0.365         |
| LA/weight (mm/g)      | 0.099±0.012 | 0.091±0.008 | 0.104±0.008 | 0.079±0.01  | 0.270            | <b>&lt;0.001</b> | <b>0.004</b>  |
| <b>Volumes</b>        |             |             |             |             |                  |                  |               |
| LVEDV/weight (µl/g)   | 2.99±0.41   | 2.64±0.38   | 2.61±0.35   | 2.45±0.34   | <b>0.003</b>     | <b>0.039</b>     | 0.437         |
| LVESV/weight (µl/g)   | 1.18±0.41   | 1.01±0.4    | 1.04±0.31   | 0.84±0.25   | 0.132            | 0.063            | 0.897         |
| <b>Functional</b>     |             |             |             |             |                  |                  |               |
| FS (%)                | 33.5±6.7    | 34.8±7.8    | 32.2±6.6    | 36.1±6.7    | 0.995            | 0.220            | 0.532         |
| EF (%)                | 62.4±8.8    | 64.1±10.4   | 60.8±9.1    | 66±8.4      | 0.946            | 0.232            | 0.539         |
| Ewave DECC (ms)       | 1.36±0.55   | 1.37±0.52   | 1.21±0.41   | 1.38±0.5    | 0.568            | 0.547            | 0.618         |
| IVRTc (ms)            | 1.46±0.13   | 1.59±0.23   | 1.52±0.29   | 1.49±0.25   | 0.707            | 0.538            | 0.334         |
| E/E' nor              | 28.4±5      | 26.1±5.9    | 28.3±6.3    | 26.7±6.5    | 0.876            | 0.376            | 0.871         |
| HR (bpm)              | 417.6±29.9  | 435.3±40.5  | 400.9±44.9  | 427.5±37.7  | 0.260            | <b>0.046</b>     | 0.687         |
| MPI                   | 15.6±2.8    | 14.6±2.3    | 15.8±2.1    | 14.8±3.5    | 0.761            | 0.245            | 0.971         |
| RLA Strain            | 18.4±4.6    | 16.1±6.4    | 20.2±7.1    | 15.9±3.9    | 0.667            | <b>0.034</b>     | 0.520         |
| RLA Strain Rate       | 4.82±1.16   | 4.72±1.21   | 4.37±1.14   | 4.3±1.29    | 0.249            | 0.806            | 0.967         |
| LLA Strain            | -14.4±4.8   | -14.5±2.7   | -12.4±2.4   | -9.8±1.7    | <b>&lt;0.001</b> | 0.137            | 0.126         |
| LLA Strain Rate       | -5.07±2.27  | -6.03±3.56  | -4.39±1.47  | -3.66±0.92  | <b>0.030</b>     | 0.852            | 0.168         |
| RSA Strain            | 21.9±8.6    | 20.1±8      | 23.6±9.8    | 22.2±6.4    | 0.517            | 0.423            | 0.926         |
| RSA Strain Rate       | 5.45±1.5    | 5.15±1.22   | 4.88±1.37   | 5.28±1.3    | 0.619            | 0.899            | 0.331         |
| CSA Strain            | -17.9±2.7   | -16.5±3.8   | -17.5±4.9   | -18.9±3     | 0.446            | 0.984            | 0.129         |
| CSA Strain Rate       | -5.57±1.16  | -4.96±1.3   | -5.28±1.44  | -5.41±0.51  | 0.834            | 0.417            | 0.218         |

Left ventricle end diastolic diameter (LVEDD), left ventricle end systolic diameter (LVESD), left ventricle mass (LV), Left atrium (LA), left ventricle end diastolic volume (LVEDV) and left ventricle end systolic volume (LVESV). E wave (E), E wave deceleration time corrected (E wave DECc.) and isovolumetric relaxation time corrected (IVRTc), heart rate (HR), E' wave (E'), ejection fraction (EF), fractional shortening (FS), myocardium performance index (MPI), radial long axis (RLA), longitudinal long axis (LLA), radial short axis (RSA), circumferential short axis (CSA). The morphological parameters and volumes were corrected for weight. E wave DECc. and IVRTc were corrected for heart rate. GEE with normal distribution and identity link function using AR(1) correlation matrix between evaluations. Values are expressed as means  $\pm$  SD. Four mice in the MMTV-PyMT<sup>-</sup> and 2 mice in the MMTV-PyMT<sup>+</sup> were excluded from this analysis because of poor imaging quality in the echocardiography. Thus, 10 mice in the MMTV-PyMT<sup>-</sup> and 13 mice in the MMTV-PyMT<sup>+</sup> were involved in this analysis. Of note, two left atrium measures were not obtained in the MMTV-PyMT<sup>+</sup> mice.

**Table S3. Organs, tissues and tumor weight in sedentary and exercise-trained MMTV-PyMT+ mice.**

| Variable        | Sedentary            |   | Exercise-trained     |    | p     |
|-----------------|----------------------|---|----------------------|----|-------|
|                 | median (IQR)         | N | median (IQR)         | N  |       |
| Heart           | 0.116 (0.11; 0.124)  | 6 | 0.113 (0.105; 0.148) | 6  | 0.937 |
| Anterior tibial | 0.036 (0.033; 0.039) | 6 | 0.029 (0.026; 0.037) | 6  | 0.180 |
| Soleus          | 0.006 (0.006; 0.007) | 6 | 0.006 (0.005; 0.006) | 6  | 0.394 |
| Liver           | 1.14 (1.08; 1.27)    | 6 | 1.21 (1.12; 1.28)    | 6  | 0.699 |
| Spleen          | 0.15 (0.077; 0.183)  | 6 | 0.095 (0.088; 0.13)  | 6  | 0.485 |
| Kidney          | 0.222 (0.204; 0.241) | 6 | 0.219 (0.198; 0.227) | 6  | 0.589 |
| Brown fat       | 0.027 (0.015; 0.032) | 6 | 0.025 (0.018; 0.034) | 6  | 0.937 |
| White fat       | 0.131 (0.075; 0.149) | 6 | 0.128 (0.055; 0.222) | 6  | 0.937 |
| Breast tumor    | 1.53 (1.5; 2.35)     | 7 | 1.59 (1.09; 2.08)    | 10 | 0.475 |
| All tumors      | 3.45 (2.37; 4.33)    | 8 | 3.2 (1.53; 5.29)     | 10 | 0.696 |

Mann-Whitney's test. Values are expressed as medians and interquartile ranges (IQR).



**Table S4. Morphological and functional cardiac parameters in sedentary and exercise-trained MMTV-PyMT+ mice in the pre and post experimental protocol.**

| Variable              | Sedentary   |             | Exercise-trained |             | p Group | p Time | p Interaction |
|-----------------------|-------------|-------------|------------------|-------------|---------|--------|---------------|
|                       | Pre         | Post        | Pre              | Post        |         |        |               |
| <b>Morphology</b>     |             |             |                  |             |         |        |               |
| LVEDD/weight (mm/g)   | 0.182±0.018 | 0.161±0.016 | 0.175±0.013      | 0.148±0.013 | 0.084   | <0.001 | 0.367         |
| LVESD/weight (mm/g)   | 0.12±0.017  | 0.111±0.011 | 0.113±0.016      | 0.094±0.017 | 0.038   | 0.001  | 0.226         |
| LV Mass/weight (mg/g) | 3.875±0.939 | 3.726±0.861 | 3.392±0.533      | 3.284±0.613 | 0.062   | 0.549  | 0.925         |
| LA/weight (mm/g)      | 0.103±0.007 | 0.088±0.009 | 0.1±0.014        | 0.089±0.006 | 0.780   | <0.001 | 0.456         |
| <b>Volumes</b>        |             |             |                  |             |         |        |               |
| LVEDV/weight (µl/g)   | 2.84±0.58   | 2.72±0.5    | 2.48±0.35        | 2.2±0.54    | 0.026   | 0.058  | 0.431         |
| LVESV/weight (µl/g)   | 1.05±0.33   | 1.11±0.2    | 0.89±0.31        | 1.03±0.56   | 0.350   | 0.452  | 0.765         |
| <b>Functional</b>     |             |             |                  |             |         |        |               |
| FS (%)                | 34.1±5.1    | 30.9±2.8    | 35.4±6.2         | 39±11.6     | 0.109   | 0.922  | 0.080         |
| EF (%)                | 63.6±7.1    | 59.1±3.9    | 65.5±8.2         | 63±16.4     | 0.417   | 0.291  | 0.763         |
| Ewave DECC (ms)       | 1.75±0.61   | 1.29±0.33   | 1.7±0.67         | 1.43±0.5    | 0.821   | 0.018  | 0.558         |
| IVRTc (ms)            | 1.69±0.21   | 1.55±0.2    | 1.55±0.15        | 1.55±0.23   | 0.207   | 0.352  | 0.313         |
| E/E' nor              | 31.1±6.4    | 26.8±4.1    | 27.4±6.7         | 31.3±11.2   | 0.893   | 0.914  | 0.069         |
| HR (bpm)              | 399.3±45.4  | 424.4±25.3  | 413.4±56.7       | 433.4±19.6  | 0.360   | 0.091  | 0.848         |
| MPI                   | 13.7±2.3    | 14.6±4.4    | 13.2±1.8         | 13.1±1.4    | 0.264   | 0.620  | 0.594         |
| RLA Strain            | 18.4±8.2    | 15.5±6.4    | 18.4±5.4         | 16.4±6.3    | 0.812   | 0.302  | 0.830         |
| RLA Strain Rate       | 5.58±2.86   | 4.54±1.18   | 4.53±1.27        | 5.2±1.87    | 0.783   | 0.720  | 0.095         |
| LLA Strain            | -14.2±2.7   | -11.4±3.1   | -13±3.8          | -16.4±6     | 0.117   | 0.838  | 0.055         |
| LLA Strain Rate       | -5.03±2.12  | -3.76±1.51  | -4.41±1.48       | -5.75±2.2   | 0.265   | 0.957  | 0.032         |
| RSA Strain            | 26±7.1      | 21.9±10.5   | 18.2±7           | 21.1±9.8    | 0.092   | 0.848  | 0.280         |
| RSA Strain Rate       | 5.66±1.49   | 4.94±1.44   | 4.33±1.03        | 5.51±1.48   | 0.263   | 0.669  | 0.080         |
| CSA Strain            | -19.4±2.4   | -17±4.1     | -16.3±2.8        | -17.4±4.1   | 0.235   | 0.581  | 0.144         |
| CSA Strain Rate       | -5.38±0.61  | -4.75±0.75  | -4.54±0.67       | -5.02±1.13  | 0.223   | 0.823  | 0.093         |

Left ventricle end diastolic diameter (LVEDD), left ventricle end systolic diameter (LVESD), left ventricle mass (LV), Left atrium (LA), left ventricle end diastolic volume (LVEDV) and left ventricle end systolic volume (LVESV). E wave (E), E wave deceleration time corrected (E wave DECc), isovolumetric relaxation time corrected (IVRTc), heart rate (HR), E' wave (E'), ejection fraction (EF), fractional shortening (FS), myocardium performance index (MPI), radial long axis (RLA), longitudinal long axis (LLA), radial short axis (RSA), circumferential short axis (CSA). The morphological parameters and volumes were corrected by weight. E wave DECc. and IVRTc were corrected for heart rate. GEE with normal distribution and identity link function using AR(1) correlation matrix between evaluations. Values are expressed as means  $\pm$  SD. Two measurements of LVESV in MMTV-PyMT+ mice, and one measure of LA in each group were not obtained.

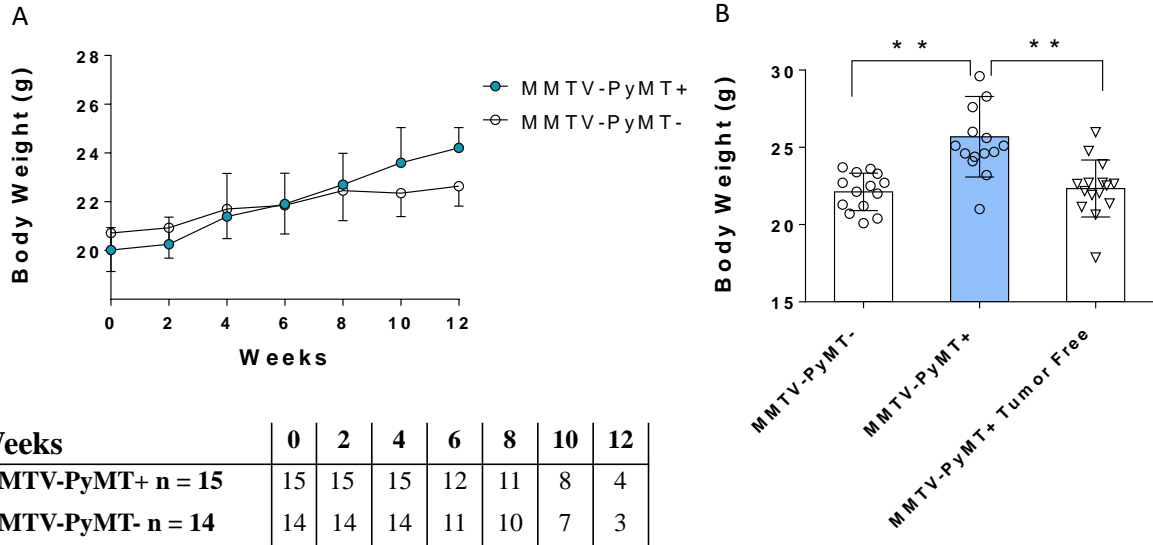

**Figure S1. Body weight of MMTV-PyMT- and MMTV-PyMT+. The greater body weight in the MMTV-PyMT+ mice can be attributed to the increase in the volume of tumors.**

(A) Evolution of body weight during experimental protocol. Numbers in the table means number of mice throughout the weeks. (B) Body weight after euthanasia between MMTV-PyMT-, MMTV-PyMT+ and MMTV-PyMT+ without tumors <sup>\*\*</sup>  $P < 0.001$ . GEE with normal distribution and identity link function using AR(1) correlation matrix between weeks followed by Bonferroni's multiple comparison. Values are expressed as means and SD.

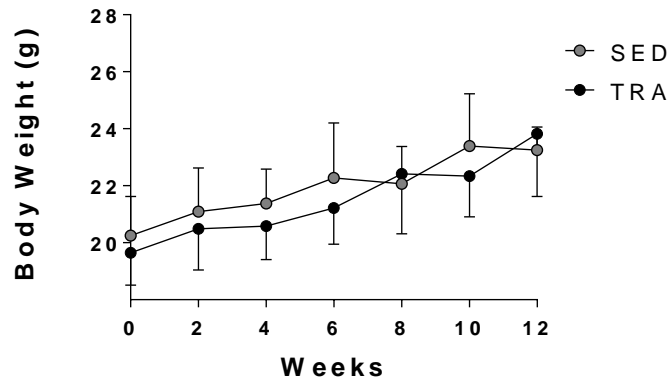

| Weeks      | 0  | 2  | 4  | 6  | 8  | 10 | 12 |
|------------|----|----|----|----|----|----|----|
| SED n = 9  | 9  | 9  | 9  | 8  | 5  | 5  | 3  |
| TRA n = 12 | 12 | 12 | 12 | 12 | 12 | 8  | 8  |

**Figure S2. Body weight in exercise-trained (TRA) and sedentary MMTV-PyMT+ mice (SED).** Numbers in the table means number of mice throughout the weeks. GEE with normal distribution and identity link function using AR(1) correlation matrix between weeks. Values are expressed as means and SD.

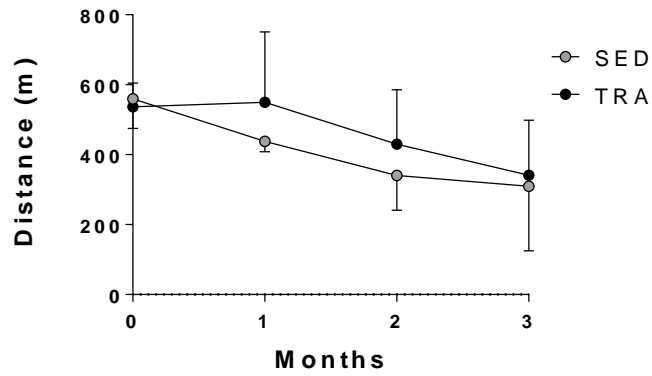

| Months     | 0  | 1  | 2  | 3  |
|------------|----|----|----|----|
| SED n = 9  | 9  | 9  | 8  | 5  |
| TRA n = 12 | 12 | 12 | 12 | 11 |

**Figure S3. Running distance in the exercise tolerance test in sedentary and exercise-trained groups.** Numbers in the table mean number of mice throughout the months. GEE with normal distribution and identity link function using AR(1) correlation matrix between weeks. Values are expressed as means and SD. Reduction in the distance covered in the exercise tolerance tests performed during the experimental protocol (p-group=0.263, p-time<0.001 and p-interaction=0.069).

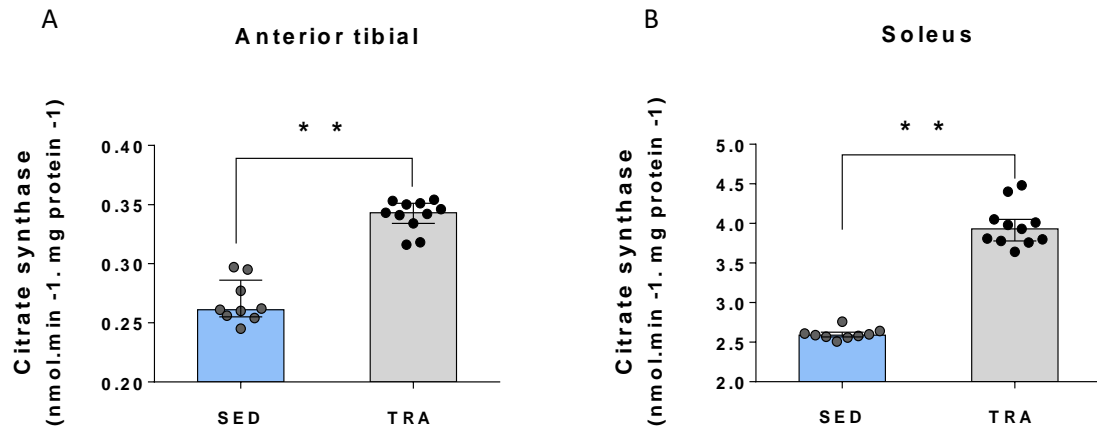

**Figure S4. Measurement of the citrate synthase enzyme activity in the anterior tibial (A) and soleus muscle (B) in sedentary and trained MMTV-PyMT<sup>+</sup>. SED=Sedentary; TRA=Exercise-trained. <sup>\*\*</sup>  $P < 0.001$ , between group difference. Mann-Whitney's test. Values are expressed as medians and interquartile ranges (IQR). Animals/group: 9 SED and 11 TRA.**

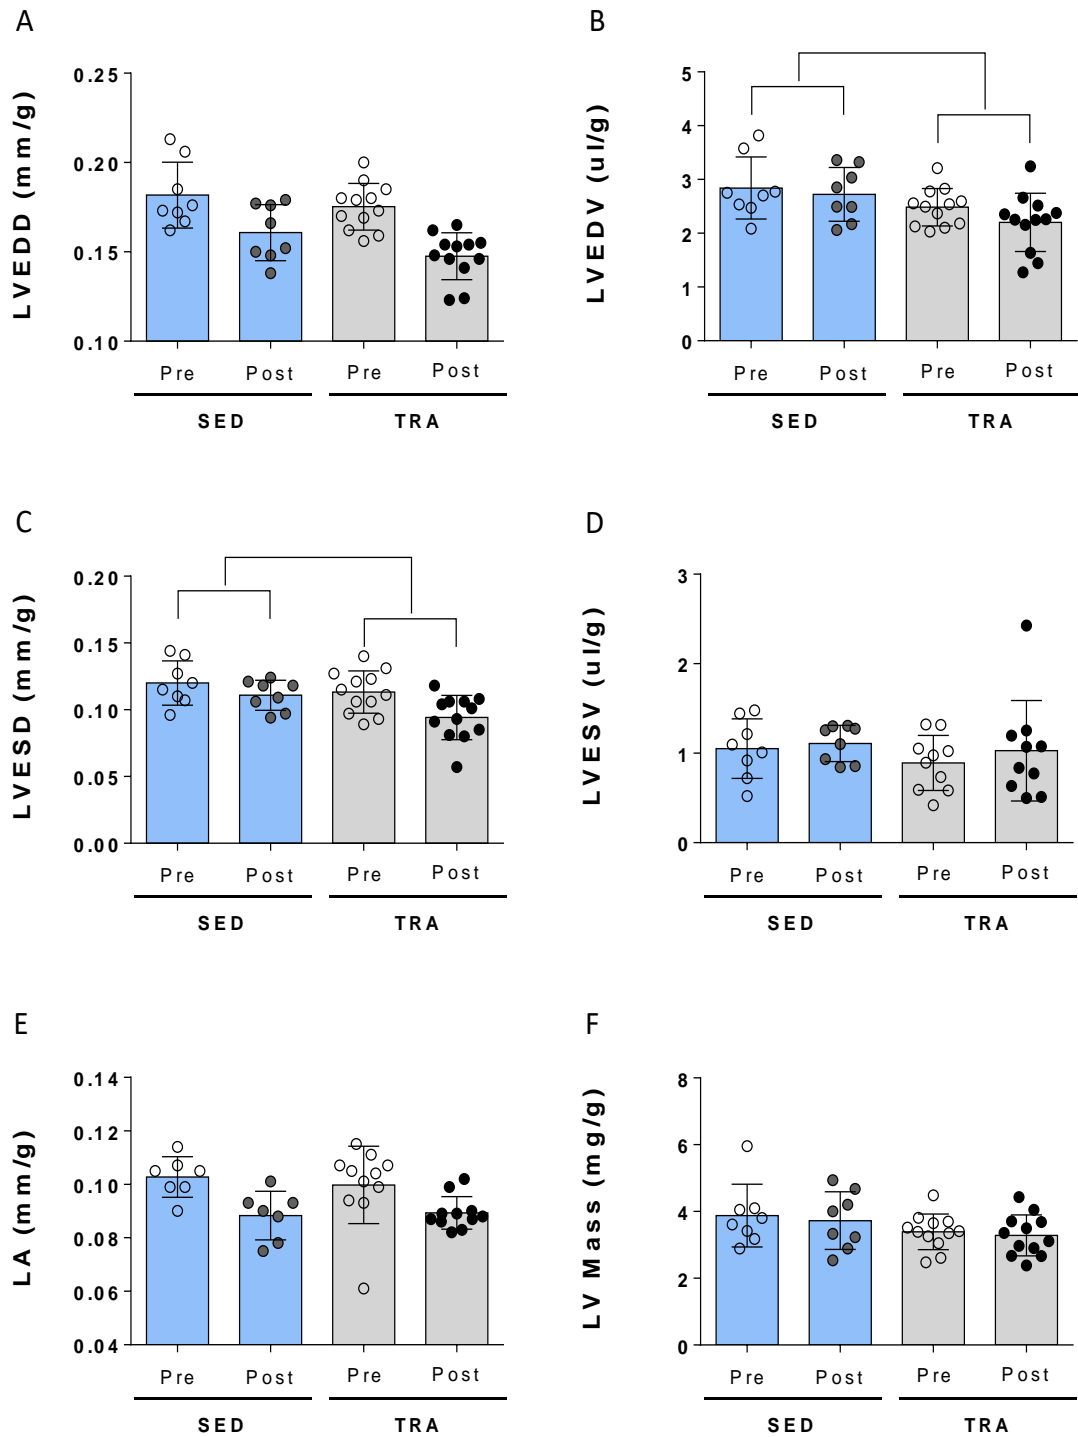

**Figure S5. Morphological cardiac parameter in sedentary and exercise-trained MMTV-PyMT+ mice in the pre and post experimental protocol.** A, Left ventricle end diastolic diameter (LVEDD); B, Left ventricle end diastolic volume (LVEDV); C, Left ventricle end systolic diameter (LVESD); D, Left ventricle end systolic volume (LVESV); E, Left atrium

(LA); F, Left ventricle mass (LV Mass). LVESD (p-group=0.038, p-interaction=0.226) and LVEDV (p-group=0.026, p-interaction=0.431) SED=Sedentary; TRA=Exercise-trained. GEE with normal distribution and identity link function using AR(1) correlation matrix between weeks. Values are expressed as means and SD. Animals/group: 8 SED and 12 TRA MMTV-PyMT+ mice. Two measures of LVESV in the exercise-trained MMTV-PyMT mice, and one measure of LA in each group were not obtained.



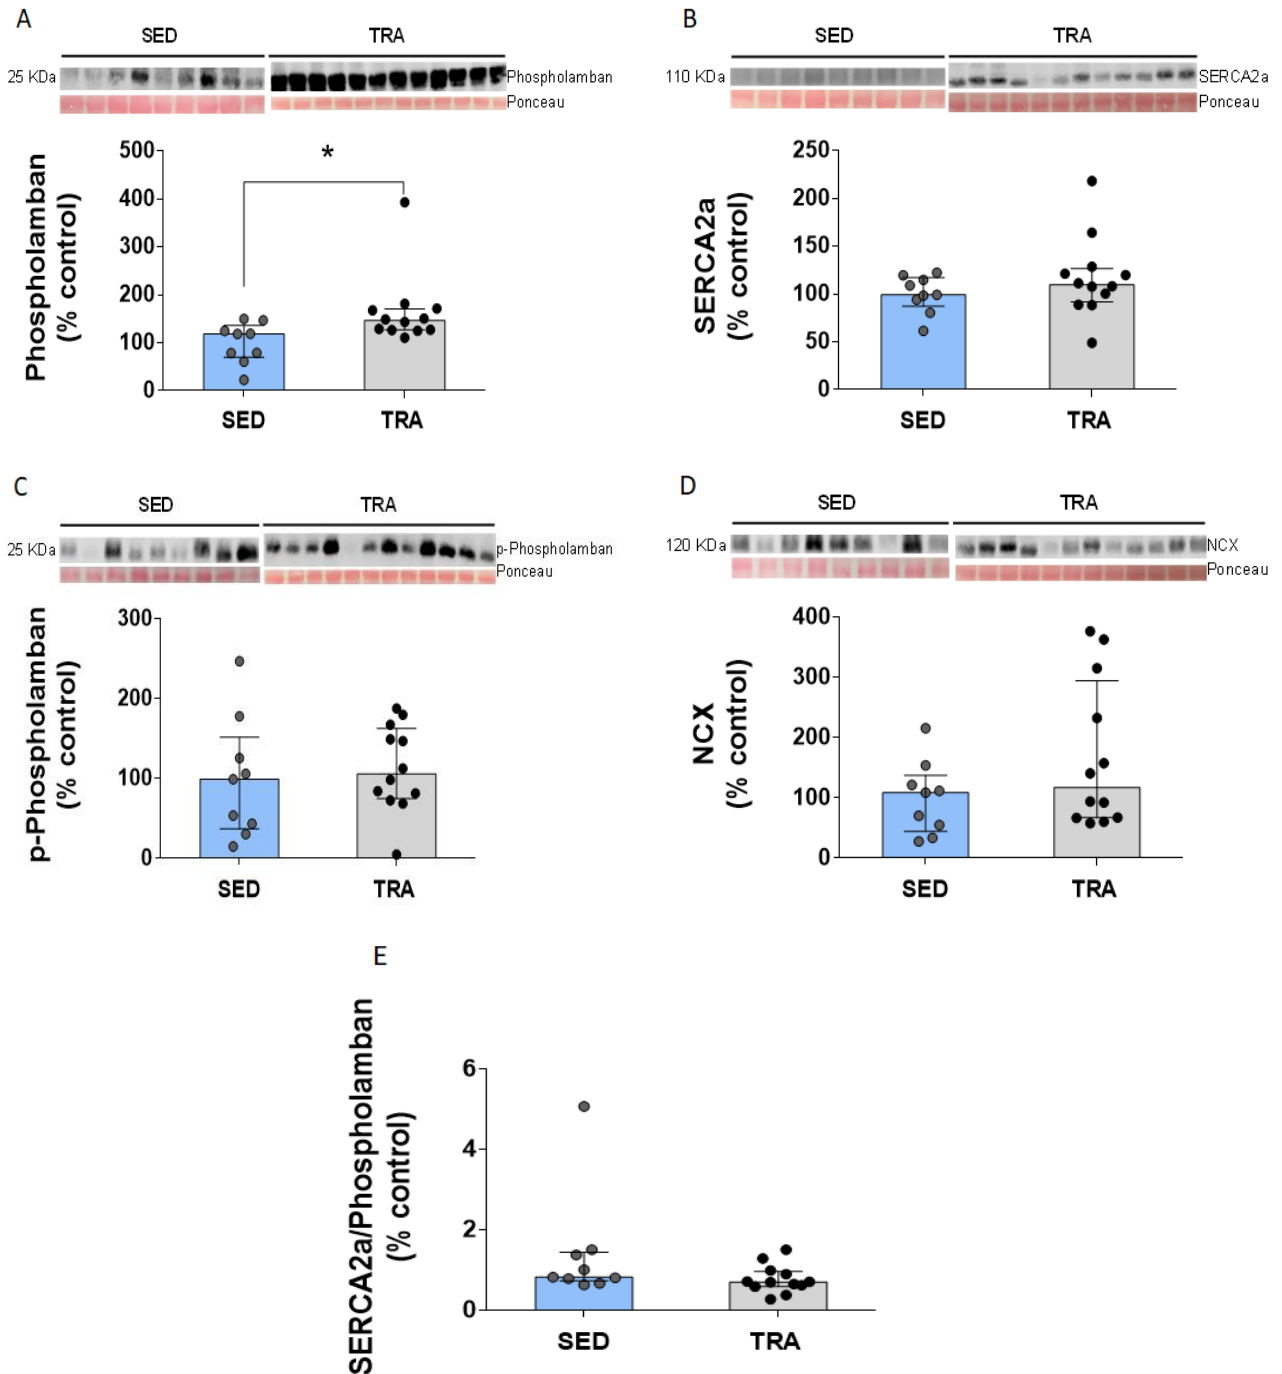

**Figure S6. Cardiac myocyte calcium handling proteins in sedentary and exercise-trained MMTV-PyMT<sup>+</sup> mice** – A, Phospholamban; B, SERCA2a; C, phosphorilated phospholamban (p-phospholamban); D, sodium/calcium exchanger (NCX) and E, SERCA2a/phospholamban ratio. Western blot bands are shown for each figure. Exercise training did not improve phospholamban (p=0.006) and did not change SERCA2a (p=0.345), p-phospholamban

( $p=0.554$ ), NCX ( $p=0.247$ ) and SERCA2a/phospholamban ( $p=0.111$ ). \* $P<0.05$ , between group difference. Animals/group: 9 sedentary (SED) and 12 exercise-trained (TRA). Mann-Whitney's test. Values are expressed as medians and interquartile ranges (IQR).
